# Supplementary figures and images for: Preemptive Homology-Directed DNA Repair Fosters Complex Genomic Rearrangements in Hepatocellular Carcinoma
Source: PubMed Central journal article supplement — Transl Oncol. 2020 May 22;13(9):100796. doi: 10.1016/j.tranon.2020.100796 (PMC7256322; doi:10.1016/j.tranon.2020.100796), 2020-05-22

### Supplementary Figure 1

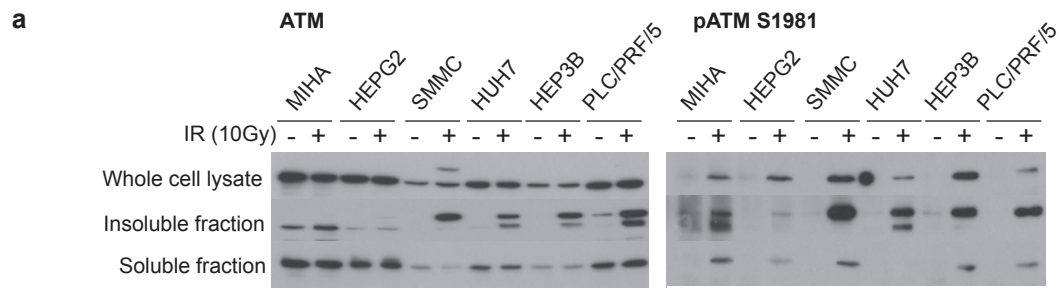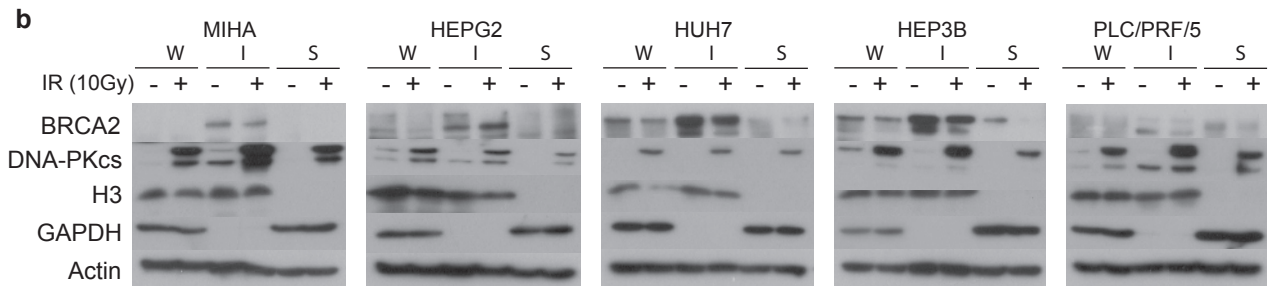

### Supplementary Figure 2

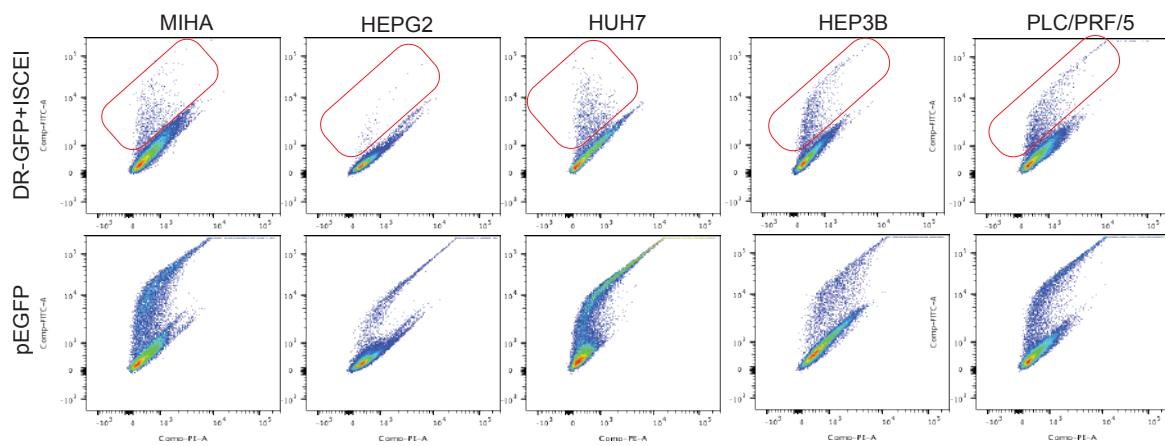

### Supplementary Figure 3

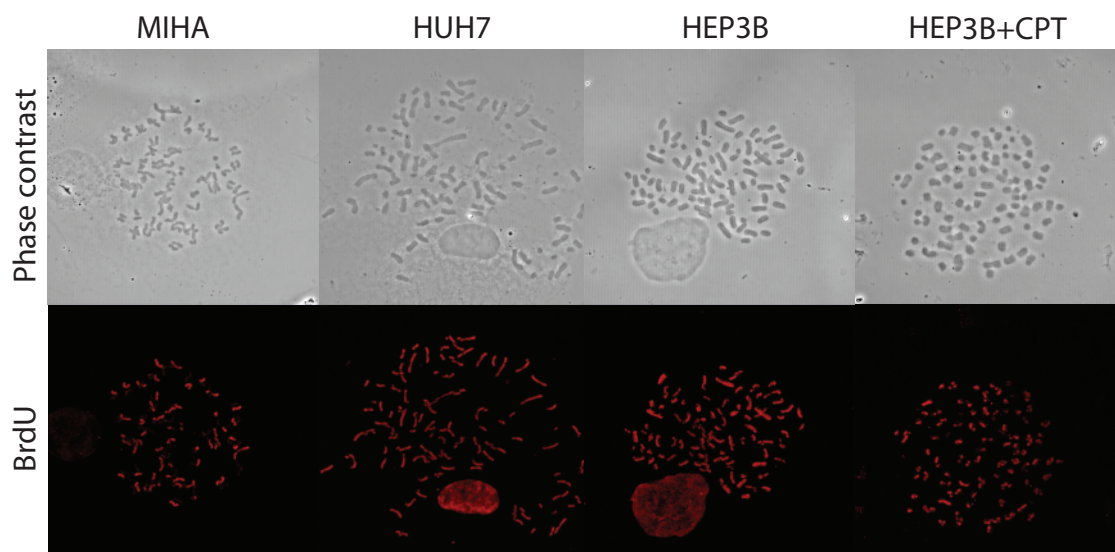

Supplement: mmc1.pdf [file mmc1.pdf]
